# Supplementary material for: Ribosome-bound Get4/5 facilitates the capture of tail-anchored proteins by Sgt2 in yeast
Source: Springer Nature journal article supplement (doi:10.1038/s41467-021-20981-3), 2021-02-04
Supplement: MOESM5 [file 41467_2021_20981_MOESM5_ESM.pdf › 41467_2021_20981_MOESM5_ESM.pdf]

## Description of Additional Supplementary information

Title: Supplementary Dataset 1

Description: Ribosomal Proteins identified by mass spectrometry from crosslinked Ni-NTA purified His<sub>6</sub>Get5.
