# Supplementary material for: Ribosome-bound Get4/5 facilitates the capture of tail-anchored proteins by Sgt2 in yeast
Source: Nat Commun. 2021 Feb 4;12:782. doi: 10.1038/s41467-021-20981-3 (PMC7862611; doi:10.1038/s41467-021-20981-3)
Supplement: Supplementary file 3 — Supplementary Dataset 1 [file 41467_2021_20981_MOESM3_ESM.xlsx]

## Sheet: Sheet1
				Get 5/4 (+)_R1	Get 5/4 (+)_R2	Get 5/4 (-)_R1	Get 5/4 (-)_R2	His_Get 5/4 (+)_R1	His_Get 5/4 (+)_R2	His_Get 5/4 (-)_R1	His_Get 5/4 (-)_R2	ratio -/+His_R1	ratio -/+His_R2
Identified Proteins (1250)	Accession Number	Molecular Weight	ANOVA Test (p-value): *(p < 0.03492)	Total Spectral Count	Total Spectral Count	Total Spectral Count	Total Spectral Count	Total Spectral Count	Total Spectral Count	Total Spectral Count	Total Spectral Count
40S ribosomal protein S0-A OS=Saccharomyces cerevisiae (strain RM11-1a) OX=285006 GN=RPS0A PE=3 SV=1	RSSA1_YEAS1 (+2)	28 kDa	0.0027	186	176	149	131	188	186	113	89	1.01075	1.05682
40S ribosomal protein S0-B OS=Saccharomyces cerevisiae (strain RM11-1a) OX=285006 GN=RPS0B PE=3 SV=1	RSSA2_YEAS1 (+2)	28 kDa	0.0013	187	177	147	134	187	184	112	91	1	1.03955
40S ribosomal protein S10-A OS=Saccharomyces cerevisiae (strain ATCC 204508 / S288c) OX=559292 GN=RPS10A PE=1 SV=1	RS10A_YEAST	13 kDa	0.001	32	31	16	17	40	34	11	15	1.25	1.09677
40S ribosomal protein S10-B OS=Saccharomyces cerevisiae (strain ATCC 204508 / S288c) OX=559292 GN=RPS10B PE=1 SV=1	RS10B_YEAST	13 kDa	0.001	32	31	16	17	40	34	11	15	1.25	1.09677
40S ribosomal protein S11-A OS=Saccharomyces cerevisiae (strain ATCC 204508 / S288c) OX=559292 GN=RPS11A PE=1 SV=1	RS11A_YEAST (+1)	18 kDa	0.00028	218	218	152	144	260	257	126	137	1.19266	1.1789
40S ribosomal protein S12 OS=Saccharomyces cerevisiae (strain ATCC 204508 / S288c) OX=559292 GN=RPS12 PE=1 SV=1	RS12_YEAST	15 kDa	< 0.00010	125	112	19	18	96	97	15	19	0.768	0.866071
40S ribosomal protein S13 OS=Saccharomyces cerevisiae (strain ATCC 204508 / S288c) OX=559292 GN=RPS13 PE=1 SV=3	RS13_YEAST	17 kDa	0.0024	120	101	69	68	134	112	52	58	1.11667	1.10891
40S ribosomal protein S14-A OS=Saccharomyces cerevisiae (strain ATCC 204508 / S288c) OX=559292 GN=RPS14A PE=1 SV=5	RS14A_YEAST	15 kDa	0.00041	60	66	20	27	85	84	22	16	1.41667	1.27273
40S ribosomal protein S14-B OS=Saccharomyces cerevisiae (strain ATCC 204508 / S288c) OX=559292 GN=RPS14B PE=1 SV=2	RS14B_YEAST	15 kDa	0.00049	60	66	20	27	85	84	23	16	1.41667	1.27273
40S ribosomal protein S16-A OS=Saccharomyces cerevisiae (strain ATCC 204508 / S288c) OX=559292 GN=RPS16A PE=1 SV=1	RS16A_YEAST (+1)	16 kDa	0.0007	50	49	21	19	49	55	20	16	0.98	1.12245
40S ribosomal protein S17-A OS=Saccharomyces cerevisiae (strain ATCC 204508 / S288c) OX=559292 GN=RPS17A PE=1 SV=1	RS17A_YEAST (+1)	16 kDa	< 0.00010	89	90	25	24	83	80	26	19	0.932584	0.888889
40S ribosomal protein S18-A OS=Saccharomyces cerevisiae (strain ATCC 204508 / S288c) OX=559292 GN=RPS18A PE=1 SV=1	RS18A_YEAST (+1)	17 kDa	0.00034	568	554	415	413	721	739	373	396	1.26937	1.33394
40S ribosomal protein S19-A OS=Saccharomyces cerevisiae (strain ATCC 204508 / S288c) OX=559292 GN=RPS19A PE=1 SV=2	RS19A_YEAST	16 kDa	0.00011	15	14	8	8	22	21	10	8	1.46667	1.5
40S ribosomal protein S19-B OS=Saccharomyces cerevisiae (strain ATCC 204508 / S288c) OX=559292 GN=RPS19B PE=1 SV=2	RS19B_YEAST	16 kDa	0.00011	15	14	8	8	22	21	10	8	1.46667	1.5
40S ribosomal protein S1-A OS=Saccharomyces cerevisiae (strain RM11-1a) OX=285006 GN=RPS1A PE=3 SV=1	RS3A1_YEAS1 (+4)	29 kDa	0.00016	397	400	264	259	407	382	228	235	1.02519	0.955
40S ribosomal protein S1-B OS=Saccharomyces cerevisiae (strain JAY291) OX=574961 GN=RPS1B PE=3 SV=1	RS3A2_YEAS2	29 kDa	0.00023	378	383	245	247	371	371	224	224	0.981481	0.968668
40S ribosomal protein S2 OS=Saccharomyces cerevisiae (strain ATCC 204508 / S288c) OX=559292 GN=RPS2 PE=1 SV=3	RS2_YEAST	27 kDa	< 0.00010	121	117	61	56	110	109	52	49	0.909091	0.931624
40S ribosomal protein S20 OS=Saccharomyces cerevisiae (strain ATCC 204508 / S288c) OX=559292 GN=RPS20 PE=1 SV=3	RS20_YEAST	14 kDa	< 0.00010	210	215	13	12	268	268	9	15	1.27619	1.24651
40S ribosomal protein S21-A OS=Saccharomyces cerevisiae (strain ATCC 204508 / S288c) OX=559292 GN=RPS21A PE=1 SV=1	RS21A_YEAST	10 kDa	0.017	48	64	28	32	71	77	31	36	1.47917	1.20312
40S ribosomal protein S21-B OS=Saccharomyces cerevisiae (strain ATCC 204508 / S288c) OX=559292 GN=RPS21B PE=1 SV=1	RS21B_YEAST	10 kDa	0.017	54	75	29	33	76	79	29	33	1.40741	1.05333
40S ribosomal protein S22-A OS=Saccharomyces cerevisiae (strain ATCC 204508 / S288c) OX=559292 GN=RPS22A PE=1 SV=2	RS22A_YEAST (+1)	15 kDa	0.0021	95	87	72	64	99	106	55	56	1.04211	1.21839
40S ribosomal protein S23-A OS=Saccharomyces cerevisiae (strain ATCC 204508 / S288c) OX=559292 GN=RPS23A PE=1 SV=1	RS23A_YEAST (+1)	16 kDa	0.011	44	41	35	25	47	41	25	20	1.06818	1
40S ribosomal protein S24-A OS=Saccharomyces cerevisiae (strain ATCC 204508 / S288c) OX=559292 GN=RPS24A PE=1 SV=1	RS24A_YEAST (+1)	15 kDa	0.00024	47	50	10	8	54	59	7	6	1.14894	1.18
40S ribosomal protein S25-B OS=Saccharomyces cerevisiae (strain ATCC 204508 / S288c) OX=559292 GN=RPS25B PE=1 SV=1	RS25B_YEAST	12 kDa	< 0.00010	113	99	15	13	112	100	14	10	0.99115	1.0101
40S ribosomal protein S26-A OS=Saccharomyces cerevisiae (strain ATCC 204508 / S288c) OX=559292 GN=RPS26A PE=1 SV=1	RS26A_YEAST	14 kDa	< 0.00010	58	58	11	14	64	66	13	15	1.10345	1.13793
40S ribosomal protein S26-B OS=Saccharomyces cerevisiae (strain ATCC 204508 / S288c) OX=559292 GN=RPS26B PE=1 SV=1	RS26B_YEAST	13 kDa	0.00011	48	47	9	12	56	60	10	12	1.16667	1.2766
40S ribosomal protein S27-A OS=Saccharomyces cerevisiae (strain ATCC 204508 / S288c) OX=559292 GN=RPS27A PE=1 SV=1	RS27A_YEAST (+1)	9 kDa	< 0.00010	101	94	63	59	135	122	62	58	1.33663	1.29787
40S ribosomal protein S28-B OS=Saccharomyces cerevisiae (strain ATCC 204508 / S288c) OX=559292 GN=RPS28B PE=1 SV=1	RS28B_YEAST	8 kDa	0.23	3	6	3	3	0	3	1	1	0	0.5
40S ribosomal protein S29-A OS=Saccharomyces cerevisiae (strain ATCC 204508 / S288c) OX=559292 GN=RPS29A PE=1 SV=3	RS29A_YEAST	7 kDa	0.0049	37	35	30	34	53	59	30	26	1.43243	1.68571
40S ribosomal protein S29-B OS=Saccharomyces cerevisiae (strain ATCC 204508 / S288c) OX=559292 GN=RPS29B PE=1 SV=3	RS29B_YEAST	7 kDa	0.0044	36	39	38	41	65	71	41	40	1.80556	1.82051
40S ribosomal protein S3 OS=Saccharomyces cerevisiae (strain ATCC 204508 / S288c) OX=559292 GN=RPS3 PE=1 SV=5	RS3_YEAST	27 kDa	< 0.00010	349	362	96	91	375	354	87	84	1.0745	0.977901
40S ribosomal protein S30-A OS=Saccharomyces cerevisiae (strain ATCC 204508 / S288c) OX=559292 GN=RPS30A PE=1 SV=1	RS30A_YEAST (+1)	7 kDa	0.0025	3	2	0	0	2	2	0	0	0.666667	1
40S ribosomal protein S4-A OS=Saccharomyces cerevisiae (strain ATCC 204508 / S288c) OX=559292 GN=RPS4A PE=1 SV=1	RS4A_YEAST (+1)	29 kDa	0.086	1206	1233	1102	1340	1421	1337	1049	1048	1.17828	1.08435
40S ribosomal protein S5 OS=Saccharomyces cerevisiae (strain ATCC 204508 / S288c) OX=559292 GN=RPS5 PE=1 SV=3	RS5_YEAST	25 kDa	< 0.00010	84	76	66	69	96	90	45	44	1.14286	1.18421
40S ribosomal protein S6-A OS=Saccharomyces cerevisiae (strain ATCC 204508 / S288c) OX=559292 GN=RPS6A PE=1 SV=1	RS6A_YEAST (+1)	27 kDa	< 0.00010	113	108	47	48	89	92	40	37	0.787611	0.851852
40S ribosomal protein S7-A OS=Saccharomyces cerevisiae (strain ATCC 204508 / S288c) OX=559292 GN=RPS7A PE=1 SV=4	RS7A_YEAST	22 kDa	< 0.00010	143	131	25	22	149	131	22	20	1.04196	1
40S ribosomal protein S7-B OS=Saccharomyces cerevisiae (strain ATCC 204508 / S288c) OX=559292 GN=RPS7B PE=1 SV=1	RS7B_YEAST	22 kDa	< 0.00010	70	69	9	10	73	60	7	9	1.04286	0.869565
40S ribosomal protein S8-A OS=Saccharomyces cerevisiae (strain ATCC 204508 / S288c) OX=559292 GN=RPS8A PE=1 SV=1	RS8A_YEAST (+1)	22 kDa	0.00012	199	182	162	158	231	211	111	114	1.1608	1.15934
40S ribosomal protein S9-A OS=Saccharomyces cerevisiae (strain ATCC 204508 / S288c) OX=559292 GN=RPS9A PE=1 SV=3	RS9A_YEAST	22 kDa	< 0.00010	190	175	46	50	234	216	46	45	1.23158	1.23429
40S ribosomal protein S9-B OS=Saccharomyces cerevisiae (strain ATCC 204508 / S288c) OX=559292 GN=RPS9B PE=1 SV=4	RS9B_YEAST	22 kDa	< 0.00010	212	201	51	52	260	233	50	49	1.22642	1.1592
60S acidic ribosomal protein P0 OS=Saccharomyces cerevisiae (strain ATCC 204508 / S288c) OX=559292 GN=RPP0 PE=1 SV=2	RLA0_YEAST	34 kDa	0.00039	219	207	183	174	219	214	118	129	1	1.03382
60S ribosomal protein L10 OS=Saccharomyces cerevisiae (strain ATCC 204508 / S288c) OX=559292 GN=RPL10 PE=1 SV=1	RL10_YEAST	25 kDa	< 0.00010	329	307	247	255	384	378	232	229	1.16717	1.23127
60S ribosomal protein L11-A OS=Saccharomyces cerevisiae (strain ATCC 204508 / S288c) OX=559292 GN=RPL11A PE=1 SV=2	RL11A_YEAST	20 kDa	0.00083	72	72	31	30	104	83	23	25	1.44444	1.15278
60S ribosomal protein L11-B OS=Saccharomyces cerevisiae (strain ATCC 204508 / S288c) OX=559292 GN=RPL11B PE=1 SV=3	RL11B_YEAST	20 kDa	0.00083	72	72	31	30	104	83	23	25	1.44444	1.15278
60S ribosomal protein L12-A OS=Saccharomyces cerevisiae (strain ATCC 204508 / S288c) OX=559292 GN=RPL12A PE=1 SV=1	RL12A_YEAST (+1)	18 kDa	< 0.00010	117	113	29	26	150	154	22	20	1.28205	1.36283
60S ribosomal protein L13-A OS=Saccharomyces cerevisiae (strain ATCC 204508 / S288c) OX=559292 GN=RPL13A PE=1 SV=1	RL13A_YEAST	23 kDa	< 0.00010	290	277	164	179	320	307	137	134	1.10345	1.1083
60S ribosomal protein L13-B OS=Saccharomyces cerevisiae (strain ATCC 204508 / S288c) OX=559292 GN=RPL13B PE=1 SV=1	RL13B_YEAST	23 kDa	< 0.00010	303	292	167	185	333	320	141	138	1.09901	1.09589
60S ribosomal protein L14-A OS=Saccharomyces cerevisiae (strain ATCC 204508 / S288c) OX=559292 GN=RPL14A PE=1 SV=1	RL14A_YEAST	15 kDa	0.75	11	8	15	9	10	6	11	7	0.909091	0.75
60S ribosomal protein L14-B OS=Saccharomyces cerevisiae (strain ATCC 204508 / S288c) OX=559292 GN=RPL14B PE=1 SV=1	RL14B_YEAST	15 kDa	0.7	11	8	15	8	9	6	10	7	0.818182	0.75
60S ribosomal protein L15-A OS=Saccharomyces cerevisiae (strain ATCC 204508 / S288c) OX=559292 GN=RPL15A PE=1 SV=3	RL15A_YEAST	24 kDa	0.27	32	37	48	68	50	54	47	57	1.5625	1.45946
60S ribosomal protein L16-A OS=Saccharomyces cerevisiae (strain ATCC 204508 / S288c) OX=559292 GN=RPL16A PE=1 SV=3	RL16A_YEAST	22 kDa	0.006	18	17	14	16	24	26	12	14	1.33333	1.52941
60S ribosomal protein L16-B OS=Saccharomyces cerevisiae (strain ATCC 204508 / S288c) OX=559292 GN=RPL16B PE=1 SV=3	RL16B_YEAST	22 kDa	0.067	30	34	24	21	25	27	19	25	0.833333	0.794118
60S ribosomal protein L17-A OS=Saccharomyces cerevisiae (strain ATCC 204508 / S288c) OX=559292 GN=RPL17A PE=1 SV=4	RL17A_YEAST	21 kDa	0.0029	58	58	31	34	57	66	31	30	0.982759	1.13793
60S ribosomal protein L17-B OS=Saccharomyces cerevisiae (strain ATCC 204508 / S288c) OX=559292 GN=RPL17B PE=1 SV=2	RL17B_YEAST	21 kDa	0.0032	56	58	30	32	57	66	30	29	1.01786	1.13793
60S ribosomal protein L18-A OS=Saccharomyces cerevisiae (strain ATCC 204508 / S288c) OX=559292 GN=RPL18A PE=1 SV=1	RL18A_YEAST (+1)	21 kDa	0.01	93	98	87	85	126	122	96	81	1.35484	1.2449
60S ribosomal protein L19-A OS=Saccharomyces cerevisiae (strain ATCC 204508 / S288c) OX=559292 GN=RPL19A PE=1 SV=1	RL19A_YEAST (+1)	22 kDa	0.001	311	282	184	204	280	297	175	178	0.900322	1.05319
60S ribosomal protein L20-A OS=Saccharomyces cerevisiae (strain ATCC 204508 / S288c) OX=559292 GN=RPL20A PE=1 SV=1	RL20A_YEAST (+1)	20 kDa	< 0.00010	280	284	225	224	414	405	210	213	1.47857	1.42606
60S ribosomal protein L21-A OS=Saccharomyces cerevisiae (strain ATCC 204508 / S288c) OX=559292 GN=RPL21A PE=1 SV=1	RL21A_YEAST	18 kDa	0.0038	323	325	294	297	413	432	308	312	1.27864	1.32923
60S ribosomal protein L21-B OS=Saccharomyces cerevisiae (strain ATCC 204508 / S288c) OX=559292 GN=RPL21B PE=1 SV=1	RL21B_YEAST	18 kDa	0.0084	297	309	285	279	393	414	284	294	1.32323	1.33981
60S ribosomal protein L23-A OS=Saccharomyces cerevisiae (strain ATCC 204508 / S288c) OX=559292 GN=RPL23A PE=1 SV=1	RL23A_YEAST (+1)	14 kDa	0.0078	20	18	13	13	25	31	10	10	1.25	1.72222
60S ribosomal protein L24-A OS=Saccharomyces cerevisiae (strain ATCC 204508 / S288c) OX=559292 GN=RPL24A PE=1 SV=1	RL24A_YEAST	18 kDa	< 0.00010	90	84	21	19	88	88	21	19	0.977778	1.04762
60S ribosomal protein L24-B OS=Saccharomyces cerevisiae (strain ATCC 204508 / S288c) OX=559292 GN=RPL24B PE=1 SV=1	RL24B_YEAST	18 kDa	< 0.00010	94	85	20	19	86	88	19	20	0.914894	1.03529
60S ribosomal protein L25 OS=Saccharomyces cerevisiae (strain ATCC 204508 / S288c) OX=559292 GN=RPL25 PE=1 SV=4	RL25_YEAST	16 kDa	< 0.00010	76	79	7	7	74	76	6	6	0.973684	0.962025
60S ribosomal protein L26-A OS=Saccharomyces cerevisiae (strain ATCC 204508 / S288c) OX=559292 GN=RPL26A PE=1 SV=3	RL26A_YEAST	14 kDa	0.0004	18	17	5	5	26	22	7	9	1.44444	1.29412
60S ribosomal protein L26-B OS=Saccharomyces cerevisiae (strain ATCC 204508 / S288c) OX=559292 GN=RPL26B PE=1 SV=2	RL26B_YEAST	14 kDa	0.0013	18	18	5	6	26	23	6	10	1.44444	1.27778
60S ribosomal protein L27-A OS=Saccharomyces cerevisiae (strain ATCC 204508 / S288c) OX=559292 GN=RPL27A PE=1 SV=1	RL27A_YEAST	16 kDa	0.00028	367	347	129	154	414	443	152	168	1.12807	1.27666
60S ribosomal protein L28 OS=Saccharomyces cerevisiae (strain ATCC 204508 / S288c) OX=559292 GN=RPL28 PE=1 SV=3	RL28_YEAST	17 kDa	0.035	908	926	795	875	881	922	744	775	0.970264	0.99568
60S ribosomal protein L2-A OS=Saccharomyces cerevisiae (strain ATCC 204508 / S288c) OX=559292 GN=RPL2A PE=1 SV=1	RL2A_YEAST (+1)	27 kDa	0.011	1356	1358	1119	1321	1489	1433	1054	1028	1.09808	1.05523
60S ribosomal protein L3 OS=Saccharomyces cerevisiae (strain ATCC 204508 / S288c) OX=559292 GN=RPL3 PE=1 SV=4	RL3_YEAST	44 kDa	0.0097	2183	1929	2221	2208	1835	1822	1911	1887	0.840586	0.944531
60S ribosomal protein L30 OS=Saccharomyces cerevisiae (strain ATCC 204508 / S288c) OX=559292 GN=RPL30 PE=1 SV=3	RL30_YEAST	11 kDa	< 0.00010	104	87	4	4	101	102	5	3	0.971154	1.17241
60S ribosomal protein L31-A OS=Saccharomyces cerevisiae (strain ATCC 204508 / S288c) OX=559292 GN=RPL31A PE=1 SV=1	RL31A_YEAST	13 kDa	0.0025	53	57	35	30	66	73	26	28	1.24528	1.2807
60S ribosomal protein L31-B OS=Saccharomyces cerevisiae (strain ATCC 204508 / S288c) OX=559292 GN=RPL31B PE=1 SV=1	RL31B_YEAST	13 kDa	0.0056	50	49	34	30	58	69	26	27	1.16	1.40816
60S ribosomal protein L32 OS=Saccharomyces cerevisiae (strain ATCC 204508 / S288c) OX=559292 GN=RPL32 PE=1 SV=1	RL32_YEAST	15 kDa	0.092	360	445	317	317	440	406	311	347	1.22222	0.91236
60S ribosomal protein L33-A OS=Saccharomyces cerevisiae (strain ATCC 204508 / S288c) OX=559292 GN=RPL33A PE=1 SV=3	RL33A_YEAST	12 kDa	0.0038	36	41	24	23	50	48	30	25	1.38889	1.17073
60S ribosomal protein L33-B OS=Saccharomyces cerevisiae (strain ATCC 204508 / S288c) OX=559292 GN=RPL33B PE=1 SV=2	RL33B_YEAST	12 kDa	0.014	33	40	22	19	45	43	28	21	1.36364	1.075
60S ribosomal protein L34-A OS=Saccharomyces cerevisiae (strain ATCC 204508 / S288c) OX=559292 GN=RPL34A PE=1 SV=1	RL34A_YEAST (+1)	14 kDa	0.015	17	13	8	6	12	14	8	6	0.705882	1.07692
60S ribosomal protein L35-A OS=Saccharomyces cerevisiae (strain ATCC 204508 / S288c) OX=559292 GN=RPL35A PE=1 SV=1	RL35A_YEAST (+1)	14 kDa	0.0034	42	45	22	27	48	48	22	14	1.14286	1.06667
60S ribosomal protein L36-A OS=Saccharomyces cerevisiae (strain ATCC 204508 / S288c) OX=559292 GN=RPL36A PE=1 SV=3	RL36A_YEAST	11 kDa	0.00019	32	30	1	1	30	23	3	3	0.9375	0.766667
60S ribosomal protein L36-B OS=Saccharomyces cerevisiae (strain ATCC 204508 / S288c) OX=559292 GN=RPL36B PE=1 SV=3	RL36B_YEAST	11 kDa	0.0028	37	41	6	2	44	30	4	4	1.18919	0.731707
60S ribosomal protein L37-A OS=Saccharomyces cerevisiae (strain ATCC 204508 / S288c) OX=559292 GN=RPL37A PE=1 SV=2	RL37A_YEAST	10 kDa	0.068	12	15	9	10	18	25	15	15	1.5	1.66667
60S ribosomal protein L37-B OS=Saccharomyces cerevisiae (strain ATCC 204508 / S288c) OX=559292 GN=RPL37B PE=1 SV=2	RL37B_YEAST	10 kDa	0.054	15	10	12	11	19	18	14	12	1.26667	1.8
60S ribosomal protein L42-A OS=Saccharomyces cerevisiae (strain ATCC 204508 / S288c) OX=559292 GN=RPL42A PE=1 SV=1	RL44A_YEAST (+1)	12 kDa	0.00024	39	45	6	8	51	49	2	1	1.30769	1.08889
60S ribosomal protein L43-A OS=Saccharomyces cerevisiae (strain ATCC 204508 / S288c) OX=559292 GN=RPL43A PE=1 SV=1	RL43A_YEAST (+1)	10 kDa	0.047	27	21	12	17	21	21	18	13	0.777778	1
60S ribosomal protein L4-A OS=Saccharomyces cerevisiae (strain ATCC 204508 / S288c) OX=559292 GN=RPL4A PE=1 SV=4	RL4A_YEAST	39 kDa	< 0.00010	497	462	334	331	503	493	320	289	1.01207	1.0671
60S ribosomal protein L4-B OS=Saccharomyces cerevisiae (strain ATCC 204508 / S288c) OX=559292 GN=RPL4B PE=1 SV=2	RL4B_YEAST	39 kDa	< 0.00010	489	451	325	320	498	488	315	286	1.0184	1.08204
60S ribosomal protein L5 OS=Saccharomyces cerevisiae (strain ATCC 204508 / S288c) OX=559292 GN=RPL5 PE=1 SV=4	RL5_YEAST	34 kDa	0.0016	263	258	257	247	287	280	192	169	1.09125	1.08527
60S ribosomal protein L6-A OS=Saccharomyces cerevisiae (strain ATCC 204508 / S288c) OX=559292 GN=RPL6A PE=1 SV=2	RL6A_YEAST	20 kDa	0.00038	48	43	20	26	52	54	14	16	1.08333	1.25581
60S ribosomal protein L6-B OS=Saccharomyces cerevisiae (strain ATCC 204508 / S288c) OX=559292 GN=RPL6B PE=1 SV=4	RL6B_YEAST	20 kDa	0.00058	45	37	18	22	48	48	15	12	1.06667	1.2973
60S ribosomal protein L7-A OS=Saccharomyces cerevisiae (strain ATCC 204508 / S288c) OX=559292 GN=RPL7A PE=1 SV=3	RL7A_YEAST	28 kDa	0.019	227	204	184	207	215	181	150	154	0.947137	0.887255
60S ribosomal protein L7-B OS=Saccharomyces cerevisiae (strain ATCC 204508 / S288c) OX=559292 GN=RPL7B PE=1 SV=3	RL7B_YEAST	28 kDa	0.0072	180	160	147	163	161	139	109	112	0.894444	0.86875
60S ribosomal protein L8-A OS=Saccharomyces cerevisiae (strain ATCC 204508 / S288c) OX=559292 GN=RPL8A PE=1 SV=4	RL8A_YEAST	28 kDa	< 0.00010	677	665	208	210	678	722	173	161	1.00148	1.08571
60S ribosomal protein L8-B OS=Saccharomyces cerevisiae (strain ATCC 204508 / S288c) OX=559292 GN=RPL8B PE=1 SV=3	RL8B_YEAST	28 kDa	< 0.00010	698	671	162	164	697	716	127	113	0.998567	1.06706
60S ribosomal protein L9-A OS=Saccharomyces cerevisiae (strain ATCC 204508 / S288c) OX=559292 GN=RPL9A PE=1 SV=2	RL9A_YEAST	22 kDa	< 0.00010	116	109	70	68	130	123	63	63	1.12069	1.12844
60S ribosomal protein L9-B OS=Saccharomyces cerevisiae (strain ATCC 204508 / S288c) OX=559292 GN=RPL9B PE=1 SV=1	RL9B_YEAST	22 kDa	< 0.00010	111	104	67	63	126	118	58	59	1.13514	1.13462
Ubiquitin-like protein MDY2 OS=Saccharomyces cerevisiae (strain ATCC 204508 / S288c) OX=559292 GN=MDY2 PE=1 SV=1	MDY2_YEAST	24 kDa	< 0.00010	137	140	30	32	720	757	432	457	5.25547	5.40714
Golgi to ER traffic protein 4 OS=Saccharomyces cerevisiae (strain ATCC 204508 / S288c) OX=559292 GN=GET4 PE=1 SV=1	GET4_YEAST	36 kDa	< 0.00010	45	52	75	73	151	152	54	53	3.35556	2.92308
Small glutamine-rich tetratricopeptide repeat-containing protein 2 OS=Saccharomyces cerevisiae (strain ATCC 204508 / S288c) OX=559292 GN=SGT2 PE=1 SV=1	SGT2_YEAST	37 kDa	0.0015	0	0	0	0	7	9	0	0
